# Supplementary material
Source: Research Square preprint supplement (doi:10.21203/rs.3.rs-9725282/v1)
Supplement: Supplementary file 2 [file 9f6ad246b8094ad2b7f60859.docx]

**ABM Simulation code**

netlogo

;; Technology Diffusion Model for Industrial Clusters - Version 2.0

;; Description:

;; This model simulates the diffusion of technology between innovator and

;; imitator enterprise agents through random movement and contact within

;; an industrial cluster.

;; Agent Types:

;; - Innovator: Enterprises that have adopted and actively spread technology

;; - Imitator: Enterprises that may adopt technology through social learning

;; - Informed: Imitators who have learned about the technology

;; - Adopter: Enterprises that have successfully adopted the technology

;; - Non-adopter: Enterprises that have rejected the technology

breed [imitator imitators] ;; Potential adopters

breed [informed informeds] ;; Imitators who know about the technology

breed [innovator innovators] ;; Technology spreaders

breed [nonadopter nonadopters] ;; Technology rejectors

breed [adopter adopters] ;; Successful adopters

;; Global Variables

globals [

total-imitator ;; Current count of imitator agents

total-informed ;; Current count of informed agents

total-innovator ;; Current count of innovator agents

total-nonadopter ;; Current count of non-adopter agents

total-adopter ;; Current count of adopter agents

]

;; Turtle Variables

turtles-own [

turn-check ;; Controls random turning behavior

wall-turn-check ;; Controls wall avoidance turning

processing ;; Timer for informed-to-innovator transition

innovativeness ;; Timer for innovator active period

adoption-check ;; Random threshold for adoption decision

nonadopter-check ;; Random threshold for non-adoption decision

]

;; Setup Procedures

to setup

;; Initialize the model

clear-turtles

pop-check

setup-agents

update-globals

do-plots

end

to building-draw

;; Use mouse to draw building obstacles (grey patches)

if mouse-down? [

ask patch mouse-xcor mouse-ycor [ set pcolor grey ]

]

end

;; Agent Initialization

to setup-agents

;; Create and initialize all agent breeds

set-default-shape imitator "person"

set-default-shape informed "person"

set-default-shape innovator "person"

set-default-shape nonadopter "person"

set-default-shape adopter "person"

;; Create imitator agents on black patches

ask n-of initial-imitator patches with [pcolor = black] [

sprout-imitator 1 [

set color blue

]

]

;; Create innovator agents on black patches

ask n-of initial-innovator patches with [pcolor = black] [

sprout-innovator 1 [

set color yellow

set innovativeness technology-period

]

]

end

;; Main Simulation Loop

to go

;; Run one tick of the simulation

technology-check

;; Move all agents in small increments

repeat 5 [ ask imitator [ fd 0.2 ] display ]

repeat 5 [ ask informed [ fd 0.2 ] display ]

repeat 5 [ ask innovator [ fd 0.2 ] display ]

repeat 5 [ ask nonadopter [ fd 0.2 ] display ]

update-globals

do-plots

reset-ticks

end

;; Technology Diffusion Logic

to technology-check

;; Main diffusion logic - checks agent interactions and state transitions

;; IMITATOR: Can be informed by innovators or adopters

ask imitator [

if any? other turtles-here with [color = yellow] [ inform ]

if any? other turtles-here with [color = violet] [ inform ]

wander

]

;; INNOVATOR: Spreads technology, ages, and may become adopter or non-adopter

ask innovator [

if any? other turtles-here with [color = blue] [ inform ]

wander

set innovativeness innovativeness - 1

if innovativeness = 0 [ nonadopt-or-adopt ]

]

;; INFORMED: Can be influenced by innovators and counts down to transition

ask informed [

if any? other turtles-here with [color = yellow] [ inform ]

wander

set processing processing - 1

if processing = 0 [ get-innovator ]

]

;; NON-ADOPTER: Simply moves without interaction

ask nonadopter [ wander ]

end

;; Adoption and Information Transfer

to inform

;; Transfer technology knowledge from innovator/adopter to imitator

set nonadopter-check random 100

ifelse nonadopter-check < nonadoption-probability [

nonadoption ;; Agent rejects technology

] [

;; Agent becomes informed and starts processing timer

ask imitator-on patch-here [

set breed informed

set processing processing-period

]

ask informed-on patch-here [ set color pink ]

]

end

to get-innovator

;; Convert informed agent into an innovator

set breed innovator

set color yellow

set innovativeness technology-period

end

to adopt

;; Convert agent into successful adopter

set breed adopter

set color violet

end

to nonadopt-or-adopt

;; Decision point: agent either adopts or rejects technology

set adoption-check random 100

ifelse adoption-check < adoption-probability [

adopt

] [

nonadoption

]

end

to nonadoption

;; Convert agent into permanent non-adopter

set breed nonadopter

set color green

end

;; Movement Behavior (Wandering with Obstacle Avoidance)

to wander

;; Random movement for all agents

set turn-check random 20

if turn-check > 15 [ right-turn ]

if turn-check < 5 [ left-turn ]

;; Avoid obstacles (non-black patches)

if [pcolor] of patch-ahead 1 != black [ wall ]

end

to wall

;; Obstacle avoidance behavior

set wall-turn-check random 10

if wall-turn-check >= 6 [ wall-right-turn ]

if wall-turn-check <= 5 [ wall-left-turn ]

end

;; Turning Subroutines

to right-turn

;; Gentle right turn for wandering

rt random-float 10

end

to left-turn

;; Gentle left turn for wandering

lt random-float 10

end

to wall-right-turn

;; Sharp right turn for wall avoidance

rt 170

end

to wall-left-turn

;; Sharp left turn for wall avoidance

lt 170

end

;; Reporting and Visualization

to update-globals

;; Update global counters with current agent populations

set total-imitator (count imitator)

set total-informed (count informed)

set total-innovator (count innovator)

set total-nonadopter (count nonadopter)

set total-adopter (count adopter)

end

to do-plots

;; Update the diffusion curve plot

set-current-plot "Diffusion curve"

set-current-plot-pen "imitator"

plot total-imitator

set-current-plot-pen "informed"

plot total-informed

set-current-plot-pen "innovator"

plot total-innovator

set-current-plot-pen "nonadopter"

plot total-nonadopter

set-current-plot-pen "adopter"

plot total-adopter

end

;; Validation and Error Checking

to pop-check

;; Ensure total agent population does not exceed available patches

if initial-imitator + initial-innovator > count patches [

user-message (word "This simulation only has room for " count patches " agents.")

stop

]

end
