# Supplementary material
Source: Research Square preprint supplement (doi:10.21203/rs.3.rs-9725282/v1)
Supplement: Supplementary file 3 [file aba85ffcf026b2c802fc070b.docx]

**Appendix A**

**Pairwise comparison of internal factors (SMEs)**

Employee behavior (EB), technology attribute (TA) and firm behavior (FB).

| Importance (or preference) of one factor over another | | | | | | | | | | | |
| --- | --- | --- | --- | --- | --- | --- | --- | --- | --- | --- | --- |
| No | **Criteria** | Extremely important | Very strongly important | Strongly important | Moderately important | Equally important | Moderately important | Strongly important | Very strongly important | Extremely important | **Sub-Criteria** |
| 1 | EB |  |  |  |  |  |  |  |  |  | Trust |
| 2 | EB |  |  |  |  |  |  |  |  |  | Informal contact |
| 3 | EB |  |  |  |  |  |  |  |  |  | Absorptive capacity |
| 4 | EB |  |  |  |  |  |  |  |  |  | Culture |
| 5 | TA |  |  |  |  |  |  |  |  |  | Complexity |
| 6 | TA |  |  |  |  |  |  |  |  |  | Compatibility |
| 7 | TA |  |  |  |  |  |  |  |  |  | Relative advantage |
| 8 | FB |  |  |  |  |  |  |  |  |  | Firm strategy |
| 9 | FB |  |  |  |  |  |  |  |  |  | Cooperation |
| 10 | FB |  |  |  |  |  |  |  |  |  | Competition |

*Pair wise comparison matrix of sub criterions with respect to employee behavior*

| Employee behavior | Trust | Informal contact | Absorptive capacity | Culture |
| --- | --- | --- | --- | --- |
| Trust | 1 | 3 | 1/7 | 1 |
| Informal contact | 1/3 | 1 | 1/9 | 1/3 |
| Absorptive capacity | 7 | 9 | 1 | 7 |
| Culture | 1 | 3 | 1/7 | 1 |

*Priority Vector for sub criterions with Respect to employee behavior (Inconsistency = 0.052)*

| Employee behavior | Trust | Informal contact | Absorptive capacity | Culture | Priority vector |
| --- | --- | --- | --- | --- | --- |
| Trust | 0.107 | 0.187 | 0.102 | 0.107 | 0.125 |
| Informal contact | 0.036 | 0.062 | 0.079 | 0.036 | 0.053 |
| Absorptive capacity | 0.75 | 0.562 | 0.714 | 0.75 | 0.7 |
| Culture | 0.107 | 0.187 | 0.102 | 0.107 | 0.125 |

*Pair wise comparison matrix of sub criterions with respect technology attribute*

| Technology  attribute | Complexity | Compatibility | Relative advantage |
| --- | --- | --- | --- |
| Complexity | 1 | ½ | 1/7 |
| Compatibility | 2 | 1 | 1/5 |
| Relative advantage | 7 | 5 | 1 |

*Priority Vector for sub criterions with Respect to technology attribute (Inconsistency = 0.059)*

| Technology  attribute | Complexity | Compatibility | Relative advantage | Priority vector |
| --- | --- | --- | --- | --- |
| Complexity | 0.1 | 0.077 | 0.106 | 0.094 |
| Compatibility | 0.2 | 0.153 | 0.149 | 0.167 |
| Relative advantage | 0.7 | 0.77 | 0.745 | 0.74 |

*Pair wise comparison matrix of sub criterions with respect to firm behavior*

| Firm behavior | Adoption strategy | Cooperation | Competition | Trust | Culture |
| --- | --- | --- | --- | --- | --- |
| Adoption strategy | 1 | 3 | 2 | 2 | 2 |
| Cooperation | 1/3 | 1 | 2 | 1 | 2 |
| Competition | ½ | ½ | 1 | 1 | 2 |
| Trust | ½ | 1 | 1 | 1 | 2 |
| Culture | ½ | ½ | ½ | 1/2 | 1 |

*Priority Vector for sub criterions with Respect to firm behavior (Inconsistency = 0.07)*

| Firm behavior | Adoption strategy | Cooperation | Competition | Trust | Culture | Priority vector |
| --- | --- | --- | --- | --- | --- | --- |
| Adoption strategy | 0.353 | 0.5 | 0.31 | 0.363 | 0.22 | 0.349 |
| Cooperation | 0.117 | 0.16 | 0.31 | 0.181 | 0.22 | 0.197 |
| Competition | 0.176 | 0.08 | 0.15 | 0.181 | 0.22 | 0.161 |
| Trust | 0.176 | 0.16 | 0.15 | 0.181 | 0.22 | 0.1774 |
| Culture | 0.176 | 0.08 | 0.076 | 0.090 | 0.11 | 0.1064 |

**Pairwise comparison of external factors**

External support (ES) and social environment (SE).

| Importance (or preference) of one factor over another | | | | | | | | | | | |
| --- | --- | --- | --- | --- | --- | --- | --- | --- | --- | --- | --- |
| No | **Criteria** | Extremely important | Very strongly important | Strongly important | Moderately important | Equally important | Moderately important | Strongly important | Very strongly important | Extremely important | **Sub-criteria** |
| 1 | ES |  |  |  |  |  |  |  |  |  | R&D |
| 2 | ES |  |  |  |  |  |  |  |  |  | Training |
| 3 | ES |  |  |  |  |  |  |  |  |  | Financial support |
| 4 | ES |  |  |  |  |  |  |  |  |  | Technical suppose |
| 5 | ES |  |  |  |  |  |  |  |  |  | Regulatory |
| 6 | SE |  |  |  |  |  |  |  |  |  | Geographical proximity |
| 7 | SE |  |  |  |  |  |  |  |  |  | Social barrier |

*Pair wise comparison matrix of sub criterions with respect to external supports*

| External support | R&D | Training | Financial | Technical | Regulatory |
| --- | --- | --- | --- | --- | --- |
| R&D | 1 | ½ | 1/5 | 1 | 5 |
| Training | 2 | 1 | 1/3 | ½ | 5 |
| Financial | 5 | 3 | 1 | 1 | 9 |
| Technical | 1 | 2 | 1 | 1 | 7 |
| Regulatory | 1/5 | 1/5 | 1/9 | 1/7 | 1 |

*Priority Vector for sub criterions with Respect to external support (Inconsistency = 0.064)*

| External support | R&D | Training | Financial | Technical | Regulatory | Priority vector |
| --- | --- | --- | --- | --- | --- | --- |
| R&D | 0.1 | 0.074 | 0.075 | 0.274 | 0.185 | 0.141 |
| Training | 0.21 | 0.149 | 0.126 | 0.137 | 0.185 | 0.170 |
| Financial | 0.54 | 0.447 | 0.378 | 0.274 | 0.33 | 0.393 |
| Technical | 0.1 | 0.298 | 0.378 | 0.274 | 0.259 | 0.261 |
| Regulatory | 0.021 | 0.029 | 0.042 | 0.039 | 0.037 | 0.033 |

*Pair wise comparison matrix of sub criterions with respect to social environment*

| Social environment | Geographical proximity | Social barriers |
| --- | --- | --- |
| Geographical proximity | 1 | 5 |
| Social barriers | 1/5 | 1 |

*Priority Vector for sub criterions with Respect to external support (Inconsistency = 0.064)*

| Social environment | Geographical proximity | Social barriers | Priority vector |
| --- | --- | --- | --- |
| Geographical proximity | 0.833 | 0.833 | 0.833 |
| Social barriers | 0.166 | 0.166 | 0.166 |

**Appendix b: Fuzzy logic calculations for agent adoption decisions**

Innovator agent decision: external factors

- Technical Support (S1) TMF Parameters: a=2, m=3, b=5
- Financial Support (S2) TMF Parameters: c=3, n=4, d=5

Alpha-cut analysis at 85% confidence level (α=0.85),

For Technical Support (S1):

For Financial Support (S2):

Decision magnitude calculation

Mapping to adoption likelihood scale (1-5)

Lower Bound:

Upper Bound:

Final Decision Magnitude for Innovator Agents: [2.19, 2.74]

Imitator agents’ decision: Internal factor

- Absorptive Capacity (S1) TMF Parameters: a=2, m=3, b=4
- Relative Advantage (S2) TMF Parameters: c=1, n=2, d=3

Alpha-Cut Analysis at 85% Confidence Level (α=0.85)

For Absorptive Capacity (S1):

For Relative Advantage (S2):

Decision Magnitude Calculation

Mapping to Adoption Likelihood Scale (1-5)

Lower Bound:

Upper Bound:

Final Decision Magnitude for Imitator Agents: [2.31, 2.91]

*Triangular Membership Function for Technical Support*

*Triangular Membership Function for Financial Support*

*Triangular Membership Function for Absorptive Capacity*

*Best Fit triangular membership function for technologies’ relative advantages*
