# Supplementary material
Source: Research Square preprint supplement (doi:10.21203/rs.3.rs-9725282/v1)
Supplement: Supplementary file 3 [file bb0f7c1f385c021f8c8d5bc8.xlsx]

## Sheet: CBPMGP Adoption
Enterprise_Survey_Technology Adoption
Resp_ID	Use_CBPMGP	Adoption_Source	Internal_Source_Detail	External_Source_Detail	Enterprise_Size	Respondent_Role
ENT-001	Yes	Internal	Own effort	N/A	Small	Owner
ENT-002	Yes	Internal	Other enterprises	N/A	Small	Manager
ENT-003	No	N/A	N/A	N/A	Small	Owner
ENT-004	No	N/A	N/A	N/A	Small	Manager
ENT-005	No	N/A	N/A	N/A	Medium	Owner
ENT-006	No	N/A	N/A	N/A	Small	Owner
ENT-007	No	N/A	N/A	N/A	Small	Manager
ENT-008	No	N/A	N/A	N/A	Small	Owner
ENT-009	No	N/A	N/A	N/A	Medium	Manager
ENT-010	No	N/A	N/A	N/A	Small	Owner
ENT-011	No	N/A	N/A	N/A	Small	Owner
ENT-012	No	N/A	N/A	N/A	Medium	Manager
ENT-013	No	N/A	N/A	N/A	Small	Owner
ENT-014	No	N/A	N/A	N/A	Small	Manager
ENT-015	No	N/A	N/A	N/A	Small	Owner
ENT-016	No	N/A	N/A	N/A	Medium	Owner
ENT-017	No	N/A	N/A	N/A	Small	Manager
ENT-018	No	N/A	N/A	N/A	Small	Owner
ENT-019	No	N/A	N/A	N/A	Small	Owner
ENT-020	No	N/A	N/A	N/A	Medium	Manager
ENT-021	No	N/A	N/A	N/A	Small	Owner
ENT-022	No	N/A	N/A	N/A	Small	Manager
ENT-023	No	N/A	N/A	N/A	Small	Owner
ENT-024	No	N/A	N/A	N/A	Medium	Owner
ENT-025	No	N/A	N/A	N/A	Small	Manager
ENT-026	No	N/A	N/A	N/A	Small	Owner
ENT-027	No	N/A	N/A	N/A	Small	Owner
ENT-028	No	N/A	N/A	N/A	Medium	Manager
ENT-029	No	N/A	N/A	N/A	Small	Owner
ENT-030	No	N/A	N/A	N/A	Small	Manager
ENT-031	No	N/A	N/A	N/A	Small	Owner
ENT-032	No	N/A	N/A	N/A	Medium	Owner
ENT-033	No	N/A	N/A	N/A	Small	Manager
ENT-034	No	N/A	N/A	N/A	Small	Owner
ENT-035	No	N/A	N/A	N/A	Small	Owner
ENT-036	No	N/A	N/A	N/A	Medium	Manager
ENT-037	No	N/A	N/A	N/A	Small	Owner
ENT-038	No	N/A	N/A	N/A	Small	Manager
ENT-039	No	N/A	N/A	N/A	Small	Owner
ENT-040	No	N/A	N/A	N/A	Medium	Owner
ENT-041	No	N/A	N/A	N/A	Small	Manager
ENT-042	No	N/A	N/A	N/A	Small	Owner
ENT-043	No	N/A	N/A	N/A	Small	Owner
ENT-044	No	N/A	N/A	N/A	Medium	Manager
ENT-045	No	N/A	N/A	N/A	Small	Owner
ENT-046	No	N/A	N/A	N/A	Small	Manager
ENT-047	No	N/A	N/A	N/A	Small	Owner
ENT-048	No	N/A	N/A	N/A	Medium	Owner
ENT-049	No	N/A	N/A	N/A	Small	Manager
ENT-050	No	N/A	N/A	N/A	Small	Owner
ENT-051	No	N/A	N/A	N/A	Small	Owner
ENT-052	No	N/A	N/A	N/A	Medium	Manager
ENT-053	No	N/A	N/A	N/A	Small	Owner
ENT-054	No	N/A	N/A	N/A	Small	Manager
ENT-055	No	N/A	N/A	N/A	Small	Owner
ENT-056	No	N/A	N/A	N/A	Medium	Owner
ENT-057	No	N/A	N/A	N/A	Small	Manager
ENT-058	No	N/A	N/A	N/A	Small	Owner
ENT-059	No	N/A	N/A	N/A	Small	Owner
ENT-060	No	N/A	N/A	N/A	Medium	Manager
ENT-061	No	N/A	N/A	N/A	Small	Owner
ENT-062	No	N/A	N/A	N/A	Small	Manager
ENT-063	No	N/A	N/A	N/A	Small	Owner
ENT-064	No	N/A	N/A	N/A	Medium	Owner
ENT-065	No	N/A	N/A	N/A	Small	Manager
ENT-066	No	N/A	N/A	N/A	Small	Owner
ENT-067	No	N/A	N/A	N/A	Small	Owner
ENT-068	No	N/A	N/A	N/A	Medium	Manager
ENT-069	No	N/A	N/A	N/A	Small	Owner
ENT-070	No	N/A	N/A	N/A	Small	Manager
ENT-071	No	N/A	N/A	N/A	Small	Owner
ENT-072	No	N/A	N/A	N/A	Medium	Owner
ENT-073	No	N/A	N/A	N/A	Small	Manager
ENT-074	No	N/A	N/A	N/A	Small	Owner
ENT-075	No	N/A	N/A	N/A	Small	Owner
ENT-076	No	N/A	N/A	N/A	Medium	Manager
ENT-077	No	N/A	N/A	N/A	Small	Owner
ENT-078	No	N/A	N/A	N/A	Small	Manager
ENT-079	No	N/A	N/A	N/A	Small	Owner
ENT-080	No	N/A	N/A	N/A	Medium	Owner
ENT-081	No	N/A	N/A	N/A	Small	Manager
ENT-082	No	N/A	N/A	N/A	Small	Owner
ENT-083	No	N/A	N/A	N/A	Small	Owner
ENT-084	No	N/A	N/A	N/A	Medium	Manager
ENT-085	No	N/A	N/A	N/A	Small	Owner
ENT-086	No	N/A	N/A	N/A	Small	Manager
ENT-087	No	N/A	N/A	N/A	Small	Owner
ENT-088	No	N/A	N/A	N/A	Medium	Owner
ENT-089	No	N/A	N/A	N/A	Small	Manager
ENT-090	No	N/A	N/A	N/A	Small	Owner
ENT-091	No	N/A	N/A	N/A	Small	Owner
ENT-092	No	N/A	N/A	N/A	Medium	Manager
ENT-093	No	N/A	N/A	N/A	Small	Owner
ENT-094	No	N/A	N/A	N/A	Small	Manager
ENT-095	No	N/A	N/A	N/A	Small	Owner
ENT-096	No	N/A	N/A	N/A	Medium	Owner
ENT-097	No	N/A	N/A	N/A	Small	Manager
ENT-098	No	N/A	N/A	N/A	Small	Owner
ENT-099	No	N/A	N/A	N/A	Small	Owner
ENT-100	No	N/A	N/A	N/A	Medium	Manager
ENT-101	No	N/A	N/A	N/A	Small	Owner
ENT-102	No	N/A	N/A	N/A	Small	Manager
ENT-103	No	N/A	N/A	N/A	Small	Owner
ENT-104	No	N/A	N/A	N/A	Medium	Owner
ENT-105	No	N/A	N/A	N/A	Small	Manager
ENT-106	No	N/A	N/A	N/A	Small	Owner
ENT-107	No	N/A	N/A	N/A	Small	Owner
ENT-108	No	N/A	N/A	N/A	Medium	Manager
ENT-109	No	N/A	N/A	N/A	Small	Owner
ENT-110	No	N/A	N/A	N/A	Small	Manager
ENT-111	No	N/A	N/A	N/A	Small	Owner
ENT-112	No	N/A	N/A	N/A	Medium	Owner
ENT-113	No	N/A	N/A	N/A	Small	Manager
ENT-114	No	N/A	N/A	N/A	Small	Owner
ENT-115	No	N/A	N/A	N/A	Small	Owner
ENT-116	No	N/A	N/A	N/A	Medium	Manager
ENT-117	No	N/A	N/A	N/A	Small	Owner
ENT-118	No	N/A	N/A	N/A	Small	Manager
ENT-119	No	N/A	N/A	N/A	Small	Owner
ENT-120	No	N/A	N/A	N/A	Medium	Owner
ENT-121	No	N/A	N/A	N/A	Small	Manager
ENT-122	No	N/A	N/A	N/A	Small	Owner
ENT-123	No	N/A	N/A	N/A	Small	Owner
ENT-124	No	N/A	N/A	N/A	Medium	Manager
ENT-125	No	N/A	N/A	N/A	Small	Owner
ENT-126	No	N/A	N/A	N/A	Small	Manager
ENT-127	No	N/A	N/A	N/A	Small	Owner
ENT-128	No	N/A	N/A	N/A	Medium	Owner
ENT-129	No	N/A	N/A	N/A	Small	Manager
ENT-130	No	N/A	N/A	N/A	Small	Owner
ENT-131	No	N/A	N/A	N/A	Small	Owner
ENT-132	No	N/A	N/A	N/A	Medium	Manager
ENT-133	No	N/A	N/A	N/A	Small	Owner
ENT-134	No	N/A	N/A	N/A	Small	Manager
ENT-135	No	N/A	N/A	N/A	Small	Owner
ENT-136	No	N/A	N/A	N/A	Medium	Owner
ENT-137	No	N/A	N/A	N/A	Small	Manager
ENT-138	No	N/A	N/A	N/A	Small	Owner
ENT-139	No	N/A	N/A	N/A	Small	Owner
ENT-140	No	N/A	N/A	N/A	Medium	Manager
ENT-141	No	N/A	N/A	N/A	Small	Owner
ENT-142	No	N/A	N/A	N/A	Small	Manager
ENT-143	No	N/A	N/A	N/A	Small	Owner
ENT-144	No	N/A	N/A	N/A	Medium	Owner
ENT-145	No	N/A	N/A	N/A	Small	Manager
ENT-146	No	N/A	N/A	N/A	Small	Owner
ENT-147	No	N/A	N/A	N/A	Small	Owner
ENT-148	No	N/A	N/A	N/A	Medium	Manager
ENT-149	No	N/A	N/A	N/A	Small	Owner
ENT-150	No	N/A	N/A	N/A	Small	Manager
ENT-151	No	N/A	N/A	N/A	Small	Owner
ENT-152	No	N/A	N/A	N/A	Medium	Owner
ENT-153	No	N/A	N/A	N/A	Small	Manager
ENT-154	No	N/A	N/A	N/A	Small	Owner
ENT-155	No	N/A	N/A	N/A	Small	Owner
ENT-156	No	N/A	N/A	N/A	Medium	Manager
ENT-157	No	N/A	N/A	N/A	Small	Owner
ENT-158	No	N/A	N/A	N/A	Small	Manager
ENT-159	No	N/A	N/A	N/A	Small	Owner
ENT-160	No	N/A	N/A	N/A	Medium	Owner
ENT-161	No	N/A	N/A	N/A	Small	Manager
ENT-162	No	N/A	N/A	N/A	Small	Owner
ENT-163	No	N/A	N/A	N/A	Small	Owner
ENT-164	No	N/A	N/A	N/A	Medium	Manager
ENT-165	No	N/A	N/A	N/A	Small	Owner
ENT-166	No	N/A	N/A	N/A	Small	Manager
ENT-167	No	N/A	N/A	N/A	Small	Owner
ENT-168	No	N/A	N/A	N/A	Medium	Owner
ENT-169	No	N/A	N/A	N/A	Small	Manager
ENT-170	No	N/A	N/A	N/A	Small	Owner
ENT-171	No	N/A	N/A	N/A	Small	Owner
ENT-172	No	N/A	N/A	N/A	Medium	Manager
ENT-173	No	N/A	N/A	N/A	Small	Owner
ENT-174	No	N/A	N/A	N/A	Small	Manager
ENT-175	No	N/A	N/A	N/A	Small	Owner
ENT-176	No	N/A	N/A	N/A	Medium	Owner
ENT-177	No	N/A	N/A	N/A	Small	Manager
ENT-178	No	N/A	N/A	N/A	Small	Owner
ENT-179	No	N/A	N/A	N/A	Small	Owner
ENT-180	No	N/A	N/A	N/A	Medium	Manager
ENT-181	No	N/A	N/A	N/A	Small	Owner
ENT-182	No	N/A	N/A	N/A	Small	Manager
ENT-183	No	N/A	N/A	N/A	Small	Owner
ENT-184	No	N/A	N/A	N/A	Medium	Owner
ENT-185	No	N/A	N/A	N/A	Small	Manager
ENT-186	No	N/A	N/A	N/A	Small	Owner
ENT-187	No	N/A	N/A	N/A	Small	Owner
ENT-188	No	N/A	N/A	N/A	Medium	Manager
ENT-189	No	N/A	N/A	N/A	Small	Owner
ENT-190	No	N/A	N/A	N/A	Small	Manager
ENT-191	No	N/A	N/A	N/A	Small	Owner
ENT-192	No	N/A	N/A	N/A	Medium	Owner
ENT-193	No	N/A	N/A	N/A	Small	Manager
ENT-194	No	N/A	N/A	N/A	Small	Owner
ENT-195	No	N/A	N/A	N/A	Small	Owner
ENT-196	No	N/A	N/A	N/A	Medium	Manager
ENT-197	No	N/A	N/A	N/A	Small	Owner
ENT-198	No	N/A	N/A	N/A	Small	Manager
ENT-199	No	N/A	N/A	N/A	Small	Owner
ENT-200	No	N/A	N/A	N/A	Medium	Owner
ENT-201	No	N/A	N/A	N/A	Small	Manager
ENT-202	No	N/A	N/A	N/A	Small	Owner
ENT-203	No	N/A	N/A	N/A	Small	Owner
ENT-204	No	N/A	N/A	N/A	Medium	Manager
ENT-205	No	N/A	N/A	N/A	Small	Owner
ENT-206	No	N/A	N/A	N/A	Small	Manager
ENT-207	No	N/A	N/A	N/A	Small	Owner
ENT-208	No	N/A	N/A	N/A	Medium	Owner
ENT-209	No	N/A	N/A	N/A	Small	Manager
ENT-210	No	N/A	N/A	N/A	Small	Owner
ENT-211	No	N/A	N/A	N/A	Small	Owner
ENT-212	No	N/A	N/A	N/A	Medium	Manager
ENT-213	No	N/A	N/A	N/A	Small	Owner
ENT-214	No	N/A	N/A	N/A	Small	Manager
ENT-215	No	N/A	N/A	N/A	Small	Owner
ENT-216	No	N/A	N/A	N/A	Medium	Owner
ENT-217	No	N/A	N/A	N/A	Small	Manager
ENT-218	No	N/A	N/A	N/A	Small	Owner
ENT-219	No	N/A	N/A	N/A	Small	Owner
ENT-220	No	N/A	N/A	N/A	Medium	Manager
ENT-221	No	N/A	N/A	N/A	Small	Owner
ENT-222	No	N/A	N/A	N/A	Small	Manager
ENT-223	No	N/A	N/A	N/A	Small	Owner
ENT-224	No	N/A	N/A	N/A	Medium	Owner
ENT-225	No	N/A	N/A	N/A	Small	Manager
ENT-226	No	N/A	N/A	N/A	Small	Owner
ENT-227	No	N/A	N/A	N/A	Small	Owner
ENT-228	No	N/A	N/A	N/A	Medium	Manager
ENT-229	No	N/A	N/A	N/A	Small	Owner
ENT-230	No	N/A	N/A	N/A	Small	Manager
ENT-231	No	N/A	N/A	N/A	Small	Owner
ENT-232	No	N/A	N/A	N/A	Medium	Owner
ENT-233	No	N/A	N/A	N/A	Small	Manager
ENT-234	No	N/A	N/A	N/A	Small	Owner
ENT-235	No	N/A	N/A	N/A	Small	Owner
ENT-236	No	N/A	N/A	N/A	Medium	Manager
ENT-237	No	N/A	N/A	N/A	Small	Owner
ENT-238	No	N/A	N/A	N/A	Small	Manager
ENT-239	No	N/A	N/A	N/A	Small	Owner
ENT-240	No	N/A	N/A	N/A	Medium	Owner
ENT-241	No	N/A	N/A	N/A	Small	Manager
ENT-242	No	N/A	N/A	N/A	Small	Owner
ENT-243	No	N/A	N/A	N/A	Small	Owner
ENT-244	No	N/A	N/A	N/A	Medium	Manager
ENT-245	No	N/A	N/A	N/A	Small	Owner
ENT-246	No	N/A	N/A	N/A	Small	Manager
ENT-247	No	N/A	N/A	N/A	Small	Owner
ENT-248	No	N/A	N/A	N/A	Medium	Owner
ENT-249	No	N/A	N/A	N/A	Small	Manager
ENT-250	No	N/A	N/A	N/A	Small	Owner
ENT-251	No	N/A	N/A	N/A	Small	Owner
ENT-252	No	N/A	N/A	N/A	Medium	Manager
ENT-253	No	N/A	N/A	N/A	Small	Owner
ENT-254	No	N/A	N/A	N/A	Small	Manager
ENT-255	No	N/A	N/A	N/A	Small	Owner
ENT-256	No	N/A	N/A	N/A	Medium	Owner
ENT-257	No	N/A	N/A	N/A	Small	Manager
ENT-258	No	N/A	N/A	N/A	Small	Owner
ENT-259	No	N/A	N/A	N/A	Small	Owner
ENT-260	No	N/A	N/A	N/A	Medium	Manager
ENT-261	No	N/A	N/A	N/A	Small	Owner
ENT-262	No	N/A	N/A	N/A	Small	Manager
ENT-263	No	N/A	N/A	N/A	Small	Owner
ENT-264	No	N/A	N/A	N/A	Medium	Owner
ENT-265	No	N/A	N/A	N/A	Small	Manager
ENT-266	No	N/A	N/A	N/A	Small	Owner
ENT-267	No	N/A	N/A	N/A	Small	Owner
ENT-268	No	N/A	N/A	N/A	Medium	Manager
ENT-269	No	N/A	N/A	N/A	Small	Owner
ENT-270	No	N/A	N/A	N/A	Small	Manager
ENT-271	No	N/A	N/A	N/A	Small	Owner
ENT-272	No	N/A	N/A	N/A	Medium	Owner
ENT-273	No	N/A	N/A	N/A	Small	Manager
ENT-274	No	N/A	N/A	N/A	Small	Owner
ENT-275	No	N/A	N/A	N/A	Small	Owner
ENT-276	No	N/A	N/A	N/A	Medium	Manager
ENT-277	No	N/A	N/A	N/A	Small	Owner
ENT-278	No	N/A	N/A	N/A	Small	Manager
ENT-279	No	N/A	N/A	N/A	Small	Owner
ENT-280	No	N/A	N/A	N/A	Medium

## Sheet: Internal factors
Internal_Factors_Survey (N=110 enterprises)
Ratings scale: 1=Not available, 2=Slightly available, 3=Moderately available, 4=Highly available, 5=Very strongly available
Resp_ID	Willingness_Employees_Learn	Willingness_Firm_Learn	Working_Culture_Empower	Training_Culture	RND_Importance	Training_Importance	RND_Expenditure	Trust_Between_Enterprises	Adoption_Strategy_Focus	Competition_ValueAdded	Clustering_Positive_Effect	Culture_Social_Negative
ENT-001	4	3	4	3	2	5	1	3	3	4	5	2
ENT-002	3	4	3	4	3	4	2	4	4	3	4	3
ENT-003	5	5	4	5	5	5	4	5	5	5	5	1
ENT-004	2	2	3	2	1	3	1	2	2	3	3	4
ENT-005	4	4	5	4	4	5	3	4	4	4	5	2
ENT-006	3	3	3	3	2	4	1	3	3	3	4	3
ENT-007	2	2	2	2	1	2	1	2	2	2	3	5
ENT-008	5	4	5	4	3	5	2	5	4	4	5	2
ENT-009	4	5	4	5	5	5	4	4	5	5	4	1
ENT-010	3	3	3	3	2	3	1	3	3	3	4	3
ENT-011	2	2	2	2	1	2	1	2	2	2	3	4
ENT-012	5	5	5	5	4	5	3	5	5	5	5	1
ENT-013	4	4	4	3	3	4	2	4	4	4	4	2
ENT-014	3	3	3	4	2	4	1	3	3	3	4	3
ENT-015	2	2	2	2	1	3	1	2	2	2	3	5
ENT-016	4	4	4	4	3	4	2	4	4	4	5	2
ENT-017	5	5	5	5	4	5	3	5	5	5	5	1
ENT-018	2	2	2	2	1	2	1	2	2	2	3	4
ENT-019	4	4	4	4	3	5	2	4	4	4	4	2
ENT-020	3	3	3	3	2	3	1	3	3	3	4	3
ENT-021	5	5	4	5	5	5	4	5	5	5	5	1
ENT-022	2	2	3	2	1	3	1	2	2	3	3	4
ENT-023	4	4	5	4	4	5	3	4	4	4	5	2
ENT-024	3	3	3	3	2	4	1	3	3	3	4	3
ENT-025	2	2	2	2	1	2	1	2	2	2	3	5
ENT-026	5	4	5	4	3	5	2	5	4	4	5	2
ENT-027	4	5	4	5	5	5	4	4	5	5	4	1
ENT-028	3	3	3	3	2	3	1	3	3	3	4	3
ENT-029	2	2	2	2	1	2	1	2	2	2	3	4
ENT-030	5	5	5	5	4	5	3	5	5	5	5	1
ENT-031	4	4	4	3	3	4	2	4	4	4	4	2
ENT-032	3	3	3	4	2	4	1	3	3	3	4	3
ENT-033	2	2	2	2	1	3	1	2	2	2	3	5
ENT-034	5	5	5	5	4	5	3	5	5	5	5	1
ENT-035	4	4	4	3	3	4	2	4	4	4	4	2
ENT-036	3	3	3	4	2	4	1	3	3	3	4	3
ENT-037	2	2	2	2	1	3	1	2	2	2	3	5
ENT-038	4	4	4	4	3	4	2	4	4	4	5	2
ENT-039	5	5	5	5	4	5	3	5	5	5	5	1
ENT-040	2	2	2	2	1	2	1	2	2	2	3	4
ENT-041	4	4	4	4	3	5	2	4	4	4	4	2
ENT-042	3	3	3	3	2	3	1	3	3	3	4	3
ENT-043	5	5	4	5	5	5	4	5	5	5	5	1
ENT-044	2	2	3	2	1	3	1	2	2	3	3	4
ENT-045	4	4	5	4	4	5	3	4	4	4	5	2
ENT-046	3	3	3	3	2	4	1	3	3	3	4	3
ENT-047	2	2	2	2	1	2	1	2	2	2	3	5
ENT-048	4	4	5	4	4	5	3	4	4	4	5	2
ENT-049	5	5	4	5	5	5	4	5	5	5	5	1
ENT-050	2	2	3	2	1	3	1	2	2	3	3	4
ENT-051	4	4	5	4	4	5	3	4	4	4	5	2
ENT-052	3	3	3	3	2	4	1	3	3	3	4	3
ENT-053	2	2	2	2	1	2	1	2	2	2	3	5
ENT-054	5	4	5	4	3	5	2	5	4	4	5	2
ENT-055	4	5	4	5	5	5	4	4	5	5	4	1
ENT-056	3	3	3	3	2	3	1	3	3	3	4	3
ENT-057	2	2	2	2	1	2	1	2	2	2	3	4
ENT-058	5	5	5	5	4	5	3	5	5	5	5	1
ENT-059	4	4	4	3	3	4	2	4	4	4	4	2
ENT-060	3	3	3	4	2	4	1	3	3	3	4	3
ENT-061	2	2	2	2	1	3	1	2	2	2	3	5
ENT-062	2	2	3	2	1	3	1	2	2	3	3	4
ENT-063	4	4	5	4	4	5	3	4	4	4	5	2
ENT-064	3	3	3	3	2	4	1	3	3	3	4	3
ENT-065	2	2	2	2	1	2	1	2	2	2	3	5
ENT-066	5	4	5	4	3	5	2	5	4	4	5	2
ENT-067	4	5	4	5	5	5	4	4	5	5	4	1
ENT-068	3	3	3	3	2	3	1	3	3	3	4	3
ENT-069	2	2	2	2	1	2	1	2	2	2	3	4
ENT-070	5	5	4	5	5	5	4	5	5	5	5	1
ENT-071	2	2	3	2	1	3	1	2	2	3	3	4
ENT-072	4	4	5	4	4	5	3	4	4	4	5	2
ENT-073	3	3	3	3	2	4	1	3	3	3	4	3
ENT-074	2	2	2	2	1	2	1	2	2	2	3	5
ENT-075	5	4	5	4	3	5	2	5	4	4	5	2
ENT-076	4	5	4	5	5	5	4	4	5	5	4	1
ENT-077	3	3	3	3	2	3	1	3	3	3	4	3
ENT-078	2	2	2	2	1	2	1	2	2	2	3	4
ENT-079	5	5	5	5	4	5	3	5	5	5	5	1
ENT-080	4	4	4	3	3	4	2	4	4	4	4	2
ENT-081	3	3	3	4	2	4	1	3	3	3	4	3
ENT-082	2	2	2	2	1	3	1	2	2	2	3	5
ENT-083	2	2	2	2	1	2	1	2	2	2	3	4
ENT-084	4	3	4	3	2	5	1	3	3	4	5	2
ENT-085	3	4	3	4	3	4	2	4	4	3	4	3
ENT-086	5	5	4	5	5	5	4	5	5	5	5	1
ENT-087	2	2	3	2	1	3	1	2	2	3	3	4
ENT-088	4	4	5	4	4	5	3	4	4	4	5	2
ENT-089	3	3	3	3	2	4	1	3	3	3	4	3
ENT-090	4	5	4	5	5	5	4	4	5	5	4	1
ENT-091	2	2	3	2	1	3	1	2	2	3	3	4
ENT-092	4	4	5	4	4	5	3	4	4	4	5	2
ENT-093	3	3	3	3	2	4	1	3	3	3	4	3
ENT-094	2	2	2	2	1	2	1	2	2	2	3	5
ENT-095	5	4	5	4	3	5	2	5	4	4	5	2
ENT-096	4	5	4	5	5	5	4	4	5	5	4	1
ENT-097	3	3	3	3	2	3	1	3	3	3	4	3
ENT-098	2	2	2	2	1	2	1	2	2	2	3	4
ENT-099	4	3	4	3	2	5	1	3	3	4	5	2
ENT-100	3	4	3	4	3	4	2	4	4	3	4	3
ENT-101	5	5	4	5	5	5	4	5	5	5	5	1
ENT-102	2	2	3	2	1	3	1	2	2	3	3	4
ENT-103	4	4	5	4	4	5	3	4	4	4	5	2
ENT-104	3	3	3	3	2	4	1	3	3	3	4	3
ENT-105	4	4	5	4	4	5	3	4	4	4	5	2
ENT-106	3	3	3	3	2	4	1	3	3	3	4	3
ENT-107	2	2	2	2	1	2	1	2	2	2	3	5
ENT-108	5	4	5	4	3	5	2	5	4	4	5	2
ENT-109	4	5	4	5	5	5	4	4	5	5	4	1
ENT-110	3	3	3	3	2	3	1	3	3	3	4	3

## Sheet: Collaboration
Collaboration_Data (N=110 enterprises)
Resp_ID	Collaborate_Knowledge_Institutions	Collaboration_Means	Learning_Institution_Partner	Research_Institution_Partner	Financial_Constraint_Influential	Support_From_Financial_Institution	Most_Important_Support
ENT-001	Yes	Training, Supervision	TVETs	LIDI	Yes	No	Learning institutions
ENT-002	Yes	Training, Comment provision	Universities	LIDI	Yes	No	Research institutions
ENT-003	Yes	Training, R&D, Supervision	Universities, TVETs	LIDI	No	Yes	Financial institutions
ENT-004	No	None	None	None	Yes	No	Regulatory institutions
ENT-005	Yes	Training	TVETs	None	Yes	No	Learning institutions
ENT-006	No	None	None	None	Yes	No	Regulatory institutions
ENT-007	No	None	None	None	Yes	No	None
ENT-008	Yes	Training, R&D	TVETs	LIDI	Yes	No	Research institutions
ENT-009	Yes	Training, Supervision, Comment provision	Universities, TVETs	LIDI	No	Yes	Financial institutions
ENT-010	No	None	None	None	Yes	No	None
ENT-011	No	None	None	None	Yes	No	Regulatory institutions
ENT-012	Yes	R&D, Supervision	Universities	LIDI	No	Yes	Research institutions
ENT-013	Yes	Training	TVETs	None	Yes	No	Learning institutions
ENT-014	No	None	None	None	Yes	No	None
ENT-015	No	None	None	None	Yes	No	Regulatory institutions
ENT-016	Yes	Training, Supervision	TVETs	LIDI	Yes	No	Learning institutions
ENT-017	Yes	Training, R&D, Supervision	Universities, TVETs	LIDI	No	Yes	Financial institutions
ENT-018	No	None	None	None	Yes	No	None
ENT-019	Yes	Training	TVETs	None	Yes	No	Learning institutions
ENT-020	No	None	None	None	Yes	No	Regulatory institutions
ENT-021	No	None	None	None	Yes	No	Regulatory institutions
ENT-022	No	None	None	None	Yes	No	None
ENT-023	Yes	Training, R&D	TVETs	LIDI	Yes	No	Research institutions
ENT-024	Yes	Training, Supervision, Comment provision	Universities, TVETs	LIDI	No	Yes	Financial institutions
ENT-025	No	None	None	None	Yes	No	None
ENT-026	No	None	None	None	Yes	No	Regulatory institutions
ENT-027	Yes	Training	TVETs	None	Yes	No	Learning institutions
ENT-028	No	None	None	None	Yes	No	None
ENT-029	Yes	Training, R&D	TVETs	LIDI	Yes	No	Research institutions
ENT-030	Yes	Training, Supervision, Comment provision	Universities, TVETs	LIDI	No	Yes	Financial institutions
ENT-031	No	None	None	None	Yes	No	None
ENT-032	No	None	None	None	Yes	No	Regulatory institutions
ENT-033	Yes	R&D, Supervision	Universities	LIDI	No	Yes	Research institutions
ENT-034	No	None	None	None	Yes	No	Regulatory institutions
ENT-035	Yes	Training	TVETs	None	Yes	No	Learning institutions
ENT-036	Yes	Training, Supervision	TVETs	LIDI	Yes	No	Learning institutions
ENT-037	Yes	Training, Comment provision	Universities	LIDI	Yes	No	Research institutions
ENT-038	Yes	Training, R&D, Supervision	Universities, TVETs	LIDI	No	Yes	Financial institutions
ENT-039	No	None	None	None	Yes	No	Regulatory institutions
ENT-040	Yes	Training	TVETs	None	Yes	No	Learning institutions
ENT-041	No	None	None	None	Yes	No	Regulatory institutions
ENT-042	No	None	None	None	Yes	No	None
ENT-043	Yes	Training, R&D	TVETs	LIDI	Yes	No	Research institutions
ENT-044	Yes	Training, Supervision, Comment provision	Universities, TVETs	LIDI	No	Yes	Financial institutions
ENT-045	No	None	None	None	Yes	No	None
ENT-046	No	None	None	None	Yes	No	Regulatory institutions
ENT-047	Yes	R&D, Supervision	Universities	LIDI	No	Yes	Research institutions
ENT-048	Yes	Training	TVETs	None	Yes	No	Learning institutions
ENT-049	No	None	None	None	Yes	No	None
ENT-050	No	None	None	None	Yes	No	Regulatory institutions
ENT-051	Yes	Training, Supervision	TVETs	LIDI	Yes	No	Learning institutions
ENT-052	Yes	Training, R&D, Supervision	Universities, TVETs	LIDI	No	Yes	Financial institutions
ENT-053	No	None	None	None	Yes	No	None
ENT-054	Yes	Training	TVETs	None	Yes	No	Learning institutions
ENT-055	No	None	None	None	Yes	No	Regulatory institutions
ENT-056	Yes	Training, Supervision, Comment provision	Universities, TVETs	LIDI	No	Yes	Financial institutions
ENT-057	No	None	None	None	Yes	No	None
ENT-058	No	None	None	None	Yes	No	Regulatory institutions
ENT-059	Yes	R&D, Supervision	Universities	LIDI	No	Yes	Research institutions
ENT-060	Yes	Training	TVETs	None	Yes	No	Learning institutions
ENT-061	No	None	None	None	Yes	No	None
ENT-062	No	None	None	None	Yes	No	Regulatory institutions
ENT-063	Yes	Training, Supervision	TVETs	LIDI	Yes	No	Learning institutions
ENT-064	Yes	Training, R&D, Supervision	Universities, TVETs	LIDI	No	Yes	Financial institutions
ENT-065	No	None	None	None	Yes	No	None
ENT-066	Yes	Training	TVETs	None	Yes	No	Learning institutions
ENT-067	No	None	None	None	Yes	No	Regulatory institutions
ENT-068	No	None	None	None	Yes	No	None
ENT-069	Yes	Training, R&D	TVETs	LIDI	Yes	No	Research institutions
ENT-070	Yes	Training, Supervision, Comment provision	Universities, TVETs	LIDI	No	Yes	Financial institutions
ENT-071	No	None	None	None	Yes	No	None
ENT-072	No	None	None	None	Yes	No	Regulatory institutions
ENT-073	Yes	R&D, Supervision	Universities	LIDI	No	Yes	Research institutions
ENT-074	Yes	Training, Supervision	TVETs	LIDI	Yes	No	Learning institutions
ENT-075	Yes	Training, Comment provision	Universities	LIDI	Yes	No	Research institutions
ENT-076	Yes	Training, R&D, Supervision	Universities, TVETs	LIDI	No	Yes	Financial institutions
ENT-077	No	None	None	None	Yes	No	Regulatory institutions
ENT-078	Yes	Training	TVETs	None	Yes	No	Learning institutions
ENT-079	No	None	None	None	Yes	No	Regulatory institutions
ENT-080	No	None	None	None	Yes	No	None
ENT-081	Yes	Training, R&D	TVETs	LIDI	Yes	No	Research institutions
ENT-082	Yes	Training, Supervision, Comment provision	Universities, TVETs	LIDI	No	Yes	Financial institutions
ENT-083	No	None	None	None	Yes	No	None
ENT-084	No	None	None	None	Yes	No	Regulatory institutions
ENT-085	Yes	R&D, Supervision	Universities	LIDI	No	Yes	Research institutions
ENT-086	Yes	Training	TVETs	None	Yes	No	Learning institutions
ENT-087	No	None	None	None	Yes	No	None
ENT-088	No	None	None	None	Yes	No	Regulatory institutions
ENT-089	Yes	Training, Supervision	TVETs	LIDI	Yes	No	Learning institutions
ENT-090	Yes	Training, R&D, Supervision	Universities, TVETs	LIDI	No	Yes	Financial institutions
ENT-091	No	None	None	None	Yes	No	None
ENT-092	Yes	Training	TVETs	None	Yes	No	Learning institutions
ENT-093	No	None	None	None	Yes	No	Regulatory institutions
ENT-094	Yes	Training, R&D, Supervision	Universities, TVETs	LIDI	No	Yes	Financial institutions
ENT-095	No	None	None	None	Yes	No	None
ENT-096	Yes	Training	TVETs	None	Yes	No	Learning institutions
ENT-097	No	None	None	None	Yes	No	Regulatory institutions
ENT-098	Yes	Training, Supervision, Comment provision	Universities, TVETs	LIDI	No	Yes	Financial institutions
ENT-099	No	None	None	None	Yes	No	None
ENT-100	No	None	None	None	Yes	No	Regulatory institutions
ENT-101	Yes	R&D, Supervision	Universities	LIDI	No	Yes	Research institutions
ENT-102	Yes	Training	TVETs	None	Yes	No	Learning institutions
ENT-103	No	None	None	None	Yes	No	None
ENT-104	No	None	None	None	Yes	No	Regulatory institutions
ENT-105	Yes	Training, Supervision	TVETs	LIDI	Yes	No	Learning institutions
ENT-106	Yes	Training, R&D, Supervision	Universities, TVETs	LIDI	No	Yes	Financial institutions
ENT-107	No	None	None	None	Yes	No	None
ENT-108	Yes	Training	TVETs	None	Yes	No	Learning institutions
ENT-109	Yes	Training, Supervision, Comment provision	Universities, TVETs	LIDI	No	Yes	Financial institutions
ENT-110	No	None	None	None	Yes	No	None

## Sheet: Employee
Employee_Survey
Resp_ID	Enterprise_ID	Education_Level	Cooperative_Work_Affects_Adoption	Own_Effort_Rank	Informal_Contact_Rank	Training_Efforts_Rank	Most_Challenging_Factor	Trust_Level	Informal_Contact_Frequency	Knowledge_Sharing_Culture	Share_Informally	Social_Barriers_Perception
EMP-001	ENT-001	Diploma	Yes	3	2	3	Complexity	Medium	Sometimes	High	Yes	Moderate
EMP-002	ENT-001	BSc+	Yes	3	3	2	Compatibility	High	Every day	High	Yes	Low
EMP-003	ENT-002	High school	No	2	1	3	Complexity	Low	Rarely	Medium	No	High
EMP-004	ENT-002	Diploma	Yes	3	2	3	Not visible	Medium	Sometimes	High	Yes	Moderate
EMP-005	ENT-003	BSc+	Yes	3	3	3	Complexity	High	Every day	High	Yes	Low
EMP-006	ENT-003	Diploma	Yes	2	3	2	Compatibility	High	Sometimes	High	Yes	Low
EMP-007	ENT-004	High school	No	1	2	1	Complexity	Low	Rarely	Medium	No	High
EMP-008	ENT-005	Diploma	Yes	3	2	3	Complexity	Medium	Sometimes	High	Yes	Moderate
EMP-009	ENT-005	BSc+	Yes	3	3	2	Not visible	High	Every day	High	Yes	Low
EMP-010	ENT-006	High school	No	2	1	2	Complexity	Low	Rarely	Medium	No	High
EMP-011	ENT-007	Diploma	No	2	1	2	Compatibility	Low	Rarely	Medium	No	High
EMP-012	ENT-008	BSc+	Yes	3	3	3	Complexity	High	Every day	High	Yes	Low
EMP-013	ENT-008	Diploma	Yes	3	2	3	Complexity	Medium	Sometimes	High	Yes	Moderate
EMP-014	ENT-009	BSc+	Yes	3	3	3	Not visible	High	Every day	High	Yes	Low
EMP-015	ENT-009	Diploma	Yes	2	3	2	Compatibility	High	Sometimes	High	Yes	Low
EMP-016	ENT-010	High school	No	2	1	2	Complexity	Low	Rarely	Medium	No	High
EMP-017	ENT-011	High school	No	1	1	1	Complexity	None	Not at all	Low	No	Very High
EMP-018	ENT-012	BSc+	Yes	3	3	3	Complexity	High	Every day	High	Yes	Low
EMP-019	ENT-012	Diploma	Yes	3	2	3	Not visible	Medium	Sometimes	High	Yes	Moderate
EMP-020	ENT-013	Diploma	Yes	3	2	3	Complexity	Medium	Sometimes	High	Yes	Moderate
EMP-021	ENT-014	High school	No	2	1	2	Complexity	Low	Rarely	Medium	No	High
EMP-022	ENT-015	Diploma	Yes	3	2	3	Compatibility	Medium	Sometimes	High	Yes	Moderate
EMP-023	ENT-016	BSc+	Yes	3	3	3	Complexity	High	Every day	High	Yes	Low
EMP-024	ENT-017	Diploma	Yes	2	3	2	Not visible	High	Sometimes	High	Yes	Low
EMP-025	ENT-018	High school	No	2	1	2	Complexity	Low	Rarely	Medium	No	High
EMP-026	ENT-019	Diploma	Yes	3	2	3	Complexity	Medium	Sometimes	High	Yes	Moderate
EMP-027	ENT-020	BSc+	Yes	3	3	3	Compatibility	High	Every day	High	Yes	Low
EMP-028	ENT-021	High school	No	2	1	2	Complexity	Low	Rarely	Medium	No	High
EMP-029	ENT-022	Diploma	Yes	3	2	3	Not visible	Medium	Sometimes	High	Yes	Moderate
EMP-030	ENT-023	BSc+	Yes	3	3	3	Complexity	High	Every day	High	Yes	Low
EMP-031	ENT-024	Diploma	Yes	2	3	2	Compatibility	High	Sometimes	High	Yes	Low
EMP-032	ENT-025	High school	No	2	1	2	Complexity	Low	Rarely	Medium	No	High
EMP-033	ENT-026	Diploma	Yes	3	2	3	Complexity	Medium	Sometimes	High	Yes	Moderate
EMP-034	ENT-027	BSc+	Yes	3	3	3	Not visible	High	Every day	High	Yes	Low
EMP-035	ENT-028	High school	No	2	1	2	Complexity	Low	Rarely	Medium	No	High
EMP-036	ENT-029	Diploma	Yes	3	2	3	Compatibility	Medium	Sometimes	High	Yes	Moderate
EMP-037	ENT-030	BSc+	Yes	3	3	3	Complexity	High	Every day	High	Yes	Low
EMP-038	ENT-031	Diploma	Yes	2	3	2	Not visible	High	Sometimes	High	Yes	Low
EMP-039	ENT-032	High school	No	2	1	2	Complexity	Low	Rarely	Medium	No	High
EMP-040	ENT-033	Diploma	Yes	3	2	3	Complexity	Medium	Sometimes	High	Yes	Moderate
EMP-041	ENT-034	BSc+	Yes	3	3	3	Compatibility	High	Every day	High	Yes	Low
EMP-042	ENT-035	High school	No	2	1	2	Complexity	Low	Rarely	Medium	No	High
EMP-043	ENT-036	Diploma	Yes	3	2	3	Not visible	Medium	Sometimes	High	Yes	Moderate
EMP-044	ENT-037	BSc+	Yes	3	3	3	Complexity	High	Every day	High	Yes	Low
EMP-045	ENT-038	Diploma	Yes	2	3	2	Complexity	High	Sometimes	High	Yes	Low

## Sheet: Interview participants
Interview_Participants (N=12 interviews)
Interview_ID	Organization_Type	Role	Key_Themes_Discussed
INT-001	LIDI (Research Institution)	Director	Cloud-Based Pattern Making platform support, Digital R&D training, Software maintenance capability
INT-002	LIDI (Research Institution)	Technical Lead	Cluster collaboration for digital tools, Cloud platform diffusion barriers
INT-003	AAIT-UIL (Learning Institution)	Coordinator	Technical training for digital pattern making, Enterprise supervision on cloud tools
INT-004	IEO (Industry Extension)	Manager	Support scheduling for digital adoption, Capability building for software
INT-005	Addis Ababa Industry Office	Regulatory Officer	SME policy for digital garment processing, Regulatory tasks for tech adoption
INT-006	Federal SME Agency	Senior Expert	SME attention for cloud-based platforms, Collaboration platforms for digital tools
INT-007	Development Bank of Ethiopia	Loan Officer	Loan process for cloud software subscriptions, Equipment financing for digital infrastructure
INT-008	Development Bank of Ethiopia	Branch Manager	Cluster-specific provisions for digital garment sector, Lending constraints for software
INT-009	LIDI (Research Institution)	Researcher	Technology demonstration programs, Industry-academia linkage challenges
INT-010	AAIT-UIL (Learning Institution)	Professor	Curriculum alignment with industry needs, Digital skills gap assessment
INT-011	Federal SME Agency	Policy Advisor	National digital transformation strategy, SME technology roadmaps
INT-012	Addis Ababa Industry Office	Director	Regulatory framework for cloud adoption, Data security and compliance concerns

## Sheet: Internal AHP
Pairwise_Comparison_Internal_AHP (N=20 experts)
Resp_ID	EB_vs_Trust	EB_vs_InformalContact	EB_vs_AbsorptiveCapacity	EB_vs_Culture	TA_vs_Complexity	TA_vs_Compatibility	TA_vs_RelativeAdvantage	FB_vs_FirmStrategy	FB_vs_Cooperation	FB_vs_Competition
EXP-001	EB_Strongly	EB_Moderately	Absorptive_Strongly	Culture_Moderately	Complexity_Equally	Compatibility_Moderately	RelativeAdvantage_Strongly	FirmStrategy_Moderately	Cooperation_Equally	Competition_Moderately
EXP-002	Equally	EB_Moderately	EB_Strongly	Equally	TA_Moderately	Equally	TA_Strongly	FB_Moderately	Cooperation_Moderately	Competition_Strongly
EXP-003	Trust_VStrongly	EB_VStrongly	Absorptive_VStrongly	EB_Strongly	Complexity_Strongly	Compatibility_Strongly	RelativeAdvantage_VStrongly	FirmStrategy_Strongly	Cooperation_VStrongly	Competition_Equally
EXP-004	EB_Moderately	Equally	EB_Moderately	Culture_Strongly	Equally	Compatibility_Moderately	RelativeAdvantage_Moderately	Equally	Equally	Competition_Moderately
EXP-005	EB_Strongly	EB_Moderately	Absorptive_Strongly	EB_Moderately	Complexity_Moderately	Compatibility_Equally	RelativeAdvantage_Strongly	FirmStrategy_Moderately	Cooperation_Moderately	Competition_Strongly
EXP-006	Trust_Moderately	EB_Strongly	Absorptive_VStrongly	Culture_Equally	Complexity_Strongly	TA_Moderately	RelativeAdvantage_VStrongly	FB_Strongly	Cooperation_Strongly	Competition_Equally
EXP-007	EB_Equally	EB_Moderately	EB_Strongly	Culture_Moderately	Complexity_Moderately	Compatibility_Strongly	TA_Strongly	FirmStrategy_Equally	Cooperation_Moderately	Competition_Strongly
EXP-008	Trust_Strongly	EB_VStrongly	Absorptive_Strongly	EB_Strongly	TA_Equally	Compatibility_Moderately	RelativeAdvantage_Strongly	FB_Moderately	Cooperation_VStrongly	Competition_Moderately
EXP-009	EB_Moderately	Equally	Absorptive_Moderately	Culture_Strongly	Complexity_Strongly	TA_Moderately	RelativeAdvantage_VStrongly	FirmStrategy_Strongly	Cooperation_Equally	Competition_Strongly
EXP-010	Trust_VStrongly	EB_Moderately	EB_VStrongly	Culture_Equally	Complexity_Equally	Compatibility_Strongly	TA_Strongly	FB_Equally	Cooperation_Strongly	Competition_Moderately
EXP-011	EB_Strongly	EB_Strongly	Absorptive_Strongly	EB_Moderately	TA_Moderately	Compatibility_Equally	RelativeAdvantage_Strongly	FirmStrategy_Moderately	Cooperation_Moderately	Competition_VStrongly
EXP-012	Equally	EB_Moderately	EB_VStrongly	Culture_Strongly	Complexity_Strongly	TA_Moderately	RelativeAdvantage_Strongly	FB_Strongly	Cooperation_Equally	Competition_Moderately
EXP-013	Trust_Moderately	EB_VStrongly	Absorptive_Strongly	EB_Equally	Complexity_Moderately	Compatibility_Strongly	TA_VStrongly	FirmStrategy_Moderately	Cooperation_Strongly	Competition_Equally
EXP-014	EB_Strongly	EB_Moderately	EB_Strongly	Culture_Moderately	TA_Equally	Compatibility_Moderately	RelativeAdvantage_Strongly	FB_Moderately	Cooperation_VStrongly	Competition_Strongly
EXP-015	Trust_VStrongly	EB_Strongly	Absorptive_VStrongly	EB_Strongly	Complexity_Strongly	TA_Moderately	RelativeAdvantage_VStrongly	FirmStrategy_Strongly	Cooperation_Equally	Competition_Moderately
EXP-016	EB_Moderately	Equally	EB_Moderately	Culture_Strongly	Complexity_Equally	Compatibility_Strongly	TA_Strongly	FB_Equally	Cooperation_Moderately	Competition_Strongly
EXP-017	Trust_Strongly	EB_Moderately	Absorptive_Strongly	EB_Moderately	TA_Moderately	Compatibility_Equally	RelativeAdvantage_Strongly	FirmStrategy_Moderately	Cooperation_VStrongly	Competition_Equally
EXP-018	EB_Equally	EB_Strongly	EB_VStrongly	Culture_Moderately	Complexity_Strongly	TA_Moderately	RelativeAdvantage_VStrongly	FB_Strongly	Cooperation_Moderately	Competition_Strongly
EXP-019	Trust_Moderately	EB_Moderately	Absorptive_Strongly	EB_Strongly	Complexity_Moderately	Compatibility_Strongly	TA_Strongly	FirmStrategy_Equally	Cooperation_Strongly	Competition_Moderately
EXP-020	EB_Strongly	EB_VStrongly	EB_Strongly	Culture_Equally	TA_Equally	Compatibility_Moderately	RelativeAdvantage_Strongly	FB_Moderately	Cooperation_Equally	Competition_VStrongly

## Sheet: External AHP
Pairwise_Comparison_External_AHP (N=20 experts)
Resp_ID	ES_vs_RD	ES_vs_Training	ES_vs_FinancialSupport	ES_vs_TechnicalSupport	ES_vs_Regulatory	SE_vs_GeographicalProximity	SE_vs_SocialBarrier
EXP-001	RD_Moderately	ES_Strongly	Financial_Equally	Technical_Moderately	Regulatory_Strongly	Geographical_Moderately	SocialBarrier_Strongly
EXP-002	Equally	Training_Moderately	ES_Strongly	ES_Moderately	Regulatory_Equally	SE_Moderately	SE_Strongly
EXP-003	ES_VStrongly	ES_VStrongly	Financial_VStrongly	Technical_VStrongly	Regulatory_Strongly	Geographical_Strongly	SocialBarrier_VStrongly
EXP-004	RD_Moderately	Equally	Financial_Moderately	ES_Moderately	Equally	Equally	SocialBarrier_Moderately
EXP-005	ES_Strongly	Training_Moderately	Financial_Strongly	Technical_Equally	Regulatory_Moderately	Geographical_Moderately	SE_Moderately
EXP-006	ES_Moderately	ES_Strongly	Financial_VStrongly	Technical_Strongly	Regulatory_Equally	SE_Strongly	SocialBarrier_Moderately
EXP-007	RD_Equally	Training_Strongly	ES_Strongly	Technical_Moderately	Regulatory_Strongly	Geographical_Equally	SE_VStrongly
EXP-008	ES_VStrongly	ES_Moderately	Financial_Strongly	ES_VStrongly	Regulatory_Moderately	SE_Moderately	SocialBarrier_Strongly
EXP-009	RD_Strongly	Equally	Financial_Equally	Technical_Strongly	Regulatory_Equally	Geographical_Moderately	SE_Strongly
EXP-010	ES_Moderately	Training_Equally	ES_VStrongly	Technical_Moderately	Regulatory_Strongly	SE_Equally	SocialBarrier_Moderately
EXP-011	RD_Equally	ES_Strongly	Financial_Moderately	ES_Strongly	Regulatory_Moderately	Geographical_Strongly	SE_VStrongly
EXP-012	ES_Strongly	Training_Strongly	Financial_VStrongly	Technical_Equally	Regulatory_Equally	SE_Moderately	SocialBarrier_Strongly
EXP-013	RD_Moderately	ES_Moderately	ES_Strongly	Technical_VStrongly	Regulatory_Strongly	Geographical_Equally	SE_Moderately
EXP-014	Equally	Training_Moderately	Financial_Strongly	ES_Moderately	Regulatory_Equally	SE_Strongly	SocialBarrier_VStrongly
EXP-015	ES_VStrongly	ES_VStrongly	Financial_Equally	Technical_Strongly	Regulatory_Moderately	Geographical_Moderately	SE_Strongly
EXP-016	RD_Strongly	Equally	ES_Moderately	Technical_Equally	Regulatory_Strongly	SE_Equally	SocialBarrier_Moderately
EXP-017	ES_Moderately	Training_Strongly	Financial_VStrongly	ES_VStrongly	Regulatory_Equally	Geographical_Strongly	SE_VStrongly
EXP-018	RD_Equally	ES_Moderately	Financial_Strongly	Technical_Moderately	Regulatory_Strongly	SE_Moderately	SocialBarrier_Strongly
EXP-019	ES_Strongly	Training_Equally	ES_VStrongly	Technical_Strongly	Regulatory_Moderately	Geographical_Equally	SE_Moderately
EXP-020	RD_Moderately	ES_Strongly	Financial_Moderately	ES_Moderately	Regulatory_Strongly	SE_Strongly	SocialBarrier_VStrongly
